# Supplementary material for: Assessing the Effectiveness of Front of Pack Labels: Findings from an Online Randomised-Controlled Experiment in a Representative British Sample
Source: PubMed Central journal article supplement (PMC7999818; doi:10.3390/nu13030900), 2021-03-10
Supplement: nutrients-13-00900-s001.pdf [file nutrients-13-00900-s001.pdf]

## Supplementary File

**Table S1.** Product images, applicable labels and design features

| FOPL group                      | Product                                                                                                                                                                                                                                                                                                                                                                                                                                                            |                                                                                                                                                                                                                       |                                                                                                                                                                                                               |                   |               |               |  |     |     |     |     |     |     |     |    |     |                                                                                                                                                                                                                                                                                                                                                                                                                                                                     |                           |            |                   |               |               |  |     |      |     |     |     |     |     |    |     |                                                                                                                                                                                                                                                                                                                                                                                                                                                                       |                           |            |                    |               |              |  |      |      |     |      |     |     |     |    |     |
|---------------------------------|--------------------------------------------------------------------------------------------------------------------------------------------------------------------------------------------------------------------------------------------------------------------------------------------------------------------------------------------------------------------------------------------------------------------------------------------------------------------|-----------------------------------------------------------------------------------------------------------------------------------------------------------------------------------------------------------------------|---------------------------------------------------------------------------------------------------------------------------------------------------------------------------------------------------------------|-------------------|---------------|---------------|--|-----|-----|-----|-----|-----|-----|-----|----|-----|---------------------------------------------------------------------------------------------------------------------------------------------------------------------------------------------------------------------------------------------------------------------------------------------------------------------------------------------------------------------------------------------------------------------------------------------------------------------|---------------------------|------------|-------------------|---------------|---------------|--|-----|------|-----|-----|-----|-----|-----|----|-----|-----------------------------------------------------------------------------------------------------------------------------------------------------------------------------------------------------------------------------------------------------------------------------------------------------------------------------------------------------------------------------------------------------------------------------------------------------------------------|---------------------------|------------|--------------------|---------------|--------------|--|------|------|-----|------|-----|-----|-----|----|-----|
|                                 | <b>Pizza</b>                                                                                                                                                                                                                                                                                                                                                                                                                                                       |                                                                                                                                                                                                                       |                                                                                                                                                                                                               |                   |               |               |  |     |     |     |     |     |     |     |    |     |                                                                                                                                                                                                                                                                                                                                                                                                                                                                     |                           |            |                   |               |               |  |     |      |     |     |     |     |     |    |     |                                                                                                                                                                                                                                                                                                                                                                                                                                                                       |                           |            |                    |               |              |  |      |      |     |      |     |     |     |    |     |
| No label (baseline and control) | 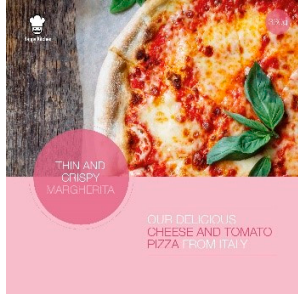                                                                                                                                                                                                                                                                                                                                                                                  |                                                                                                                                     |                                                                                                                            |                   |               |               |  |     |     |     |     |     |     |     |    |     |                                                                                                                                                                                                                                                                                                                                                                                                                                                                     |                           |            |                   |               |               |  |     |      |     |     |     |     |     |    |     |                                                                                                                                                                                                                                                                                                                                                                                                                                                                       |                           |            |                    |               |              |  |      |      |     |      |     |     |     |    |     |
| Multiple Traffic Light          | <p>Each 1/2 pizza (165g) contains</p> <table border="1"> <tr> <td>Energy<br/>156kJ<br/>36kcal</td> <td>Fat<br/>9.9g</td> <td>Saturated<br/>3.3g</td> <td>Sugar<br/>6.6g</td> <td>Salt<br/>1.16g</td> </tr> <tr> <td></td> <td>MED</td> <td>MED</td> <td>LOW</td> <td>MED</td> </tr> <tr> <td>18%</td> <td>14%</td> <td>17%</td> <td>7%</td> <td>19%</td> </tr> </table> <p>of an adult's reference intake<br/>Typical values (as sold) per 100g: 933kJ/223kcal</p> | Energy<br>156kJ<br>36kcal                                                                                                                                                                                             | Fat<br>9.9g                                                                                                                                                                                                   | Saturated<br>3.3g | Sugar<br>6.6g | Salt<br>1.16g |  | MED | MED | LOW | MED | 18% | 14% | 17% | 7% | 19% | <p>Each 1/2 pizza (165g) contains</p> <table border="1"> <tr> <td>Energy<br/>170kJ<br/>40kcal</td> <td>Fat<br/>14g</td> <td>Saturated<br/>7.6g</td> <td>Sugar<br/>5.0g</td> <td>Salt<br/>1.20g</td> </tr> <tr> <td></td> <td>MED</td> <td>HIGH</td> <td>LOW</td> <td>MED</td> </tr> <tr> <td>20%</td> <td>20%</td> <td>30%</td> <td>6%</td> <td>21%</td> </tr> </table> <p>of an adult's reference intake<br/>Typical values (as sold) per 100g: 1021kJ/245kcal</p> | Energy<br>170kJ<br>40kcal | Fat<br>14g | Saturated<br>7.6g | Sugar<br>5.0g | Salt<br>1.20g |  | MED | HIGH | LOW | MED | 20% | 20% | 30% | 6% | 21% | <p>Each 1/2 pizza (165g) contains</p> <table border="1"> <tr> <td>Energy<br/>196kJ<br/>46kcal</td> <td>Fat<br/>22g</td> <td>Saturated<br/>10.1g</td> <td>Sugar<br/>5.1g</td> <td>Salt<br/>2.8g</td> </tr> <tr> <td></td> <td>HIGH</td> <td>HIGH</td> <td>LOW</td> <td>HIGH</td> </tr> <tr> <td>23%</td> <td>31%</td> <td>50%</td> <td>6%</td> <td>47%</td> </tr> </table> <p>of an adult's reference intake<br/>Typical values (as sold) per 100g: 1198kJ/284kcal</p> | Energy<br>196kJ<br>46kcal | Fat<br>22g | Saturated<br>10.1g | Sugar<br>5.1g | Salt<br>2.8g |  | HIGH | HIGH | LOW | HIGH | 23% | 31% | 50% | 6% | 47% |
| Energy<br>156kJ<br>36kcal       | Fat<br>9.9g                                                                                                                                                                                                                                                                                                                                                                                                                                                        | Saturated<br>3.3g                                                                                                                                                                                                     | Sugar<br>6.6g                                                                                                                                                                                                 | Salt<br>1.16g     |               |               |  |     |     |     |     |     |     |     |    |     |                                                                                                                                                                                                                                                                                                                                                                                                                                                                     |                           |            |                   |               |               |  |     |      |     |     |     |     |     |    |     |                                                                                                                                                                                                                                                                                                                                                                                                                                                                       |                           |            |                    |               |              |  |      |      |     |      |     |     |     |    |     |
|                                 | MED                                                                                                                                                                                                                                                                                                                                                                                                                                                                | MED                                                                                                                                                                                                                   | LOW                                                                                                                                                                                                           | MED               |               |               |  |     |     |     |     |     |     |     |    |     |                                                                                                                                                                                                                                                                                                                                                                                                                                                                     |                           |            |                   |               |               |  |     |      |     |     |     |     |     |    |     |                                                                                                                                                                                                                                                                                                                                                                                                                                                                       |                           |            |                    |               |              |  |      |      |     |      |     |     |     |    |     |
| 18%                             | 14%                                                                                                                                                                                                                                                                                                                                                                                                                                                                | 17%                                                                                                                                                                                                                   | 7%                                                                                                                                                                                                            | 19%               |               |               |  |     |     |     |     |     |     |     |    |     |                                                                                                                                                                                                                                                                                                                                                                                                                                                                     |                           |            |                   |               |               |  |     |      |     |     |     |     |     |    |     |                                                                                                                                                                                                                                                                                                                                                                                                                                                                       |                           |            |                    |               |              |  |      |      |     |      |     |     |     |    |     |
| Energy<br>170kJ<br>40kcal       | Fat<br>14g                                                                                                                                                                                                                                                                                                                                                                                                                                                         | Saturated<br>7.6g                                                                                                                                                                                                     | Sugar<br>5.0g                                                                                                                                                                                                 | Salt<br>1.20g     |               |               |  |     |     |     |     |     |     |     |    |     |                                                                                                                                                                                                                                                                                                                                                                                                                                                                     |                           |            |                   |               |               |  |     |      |     |     |     |     |     |    |     |                                                                                                                                                                                                                                                                                                                                                                                                                                                                       |                           |            |                    |               |              |  |      |      |     |      |     |     |     |    |     |
|                                 | MED                                                                                                                                                                                                                                                                                                                                                                                                                                                                | HIGH                                                                                                                                                                                                                  | LOW                                                                                                                                                                                                           | MED               |               |               |  |     |     |     |     |     |     |     |    |     |                                                                                                                                                                                                                                                                                                                                                                                                                                                                     |                           |            |                   |               |               |  |     |      |     |     |     |     |     |    |     |                                                                                                                                                                                                                                                                                                                                                                                                                                                                       |                           |            |                    |               |              |  |      |      |     |      |     |     |     |    |     |
| 20%                             | 20%                                                                                                                                                                                                                                                                                                                                                                                                                                                                | 30%                                                                                                                                                                                                                   | 6%                                                                                                                                                                                                            | 21%               |               |               |  |     |     |     |     |     |     |     |    |     |                                                                                                                                                                                                                                                                                                                                                                                                                                                                     |                           |            |                   |               |               |  |     |      |     |     |     |     |     |    |     |                                                                                                                                                                                                                                                                                                                                                                                                                                                                       |                           |            |                    |               |              |  |      |      |     |      |     |     |     |    |     |
| Energy<br>196kJ<br>46kcal       | Fat<br>22g                                                                                                                                                                                                                                                                                                                                                                                                                                                         | Saturated<br>10.1g                                                                                                                                                                                                    | Sugar<br>5.1g                                                                                                                                                                                                 | Salt<br>2.8g      |               |               |  |     |     |     |     |     |     |     |    |     |                                                                                                                                                                                                                                                                                                                                                                                                                                                                     |                           |            |                   |               |               |  |     |      |     |     |     |     |     |    |     |                                                                                                                                                                                                                                                                                                                                                                                                                                                                       |                           |            |                    |               |              |  |      |      |     |      |     |     |     |    |     |
|                                 | HIGH                                                                                                                                                                                                                                                                                                                                                                                                                                                               | HIGH                                                                                                                                                                                                                  | LOW                                                                                                                                                                                                           | HIGH              |               |               |  |     |     |     |     |     |     |     |    |     |                                                                                                                                                                                                                                                                                                                                                                                                                                                                     |                           |            |                   |               |               |  |     |      |     |     |     |     |     |    |     |                                                                                                                                                                                                                                                                                                                                                                                                                                                                       |                           |            |                    |               |              |  |      |      |     |      |     |     |     |    |     |
| 23%                             | 31%                                                                                                                                                                                                                                                                                                                                                                                                                                                                | 50%                                                                                                                                                                                                                   | 6%                                                                                                                                                                                                            | 47%               |               |               |  |     |     |     |     |     |     |     |    |     |                                                                                                                                                                                                                                                                                                                                                                                                                                                                     |                           |            |                   |               |               |  |     |      |     |     |     |     |     |    |     |                                                                                                                                                                                                                                                                                                                                                                                                                                                                       |                           |            |                    |               |              |  |      |      |     |      |     |     |     |    |     |
| Nutri-Score                     |                                                                                                                                                                                                                                                                                                                                                                                  |                                                                                                                                     |                                                                                                                           |                   |               |               |  |     |     |     |     |     |     |     |    |     |                                                                                                                                                                                                                                                                                                                                                                                                                                                                     |                           |            |                   |               |               |  |     |      |     |     |     |     |     |    |     |                                                                                                                                                                                                                                                                                                                                                                                                                                                                       |                           |            |                    |               |              |  |      |      |     |      |     |     |     |    |     |
| Warning label                   |                                                                                                                                                                                                                                                                                                                                                                                                                                                                    |                                                                                                                                    |                                                                                                                          |                   |               |               |  |     |     |     |     |     |     |     |    |     |                                                                                                                                                                                                                                                                                                                                                                                                                                                                     |                           |            |                   |               |               |  |     |      |     |     |     |     |     |    |     |                                                                                                                                                                                                                                                                                                                                                                                                                                                                       |                           |            |                    |               |              |  |      |      |     |      |     |     |     |    |     |
| Positive Choice tick            |                                                                                                                                                                                                                                                                                                                                                                                 |                                                                                                                                                                                                                       |                                                                                                                                                                                                               |                   |               |               |  |     |     |     |     |     |     |     |    |     |                                                                                                                                                                                                                                                                                                                                                                                                                                                                     |                           |            |                   |               |               |  |     |      |     |     |     |     |     |    |     |                                                                                                                                                                                                                                                                                                                                                                                                                                                                       |                           |            |                    |               |              |  |      |      |     |      |     |     |     |    |     |
| Design features                 | <p><u>Description:</u> 'Thin and crispy margherita' and 'Our delicious cheese and tomato pizza from Italy'<br/><u>Image:</u> Pizza with cheese, tomato sauce and fresh basil<br/><u>Colour:</u> light pink</p>                                                                                                                                                                                                                                                     | <p><u>Description:</u> 'Margherita' and 'Our delicious cheese and tomato pizza from Italy'<br/><u>Image:</u> Pizza with cheese (more than 1), tomato sauce and fresh basil (less than 1)<br/><u>Colour:</u> green</p> | <p><u>Description:</u> 'Four cheese margherita' and 'Mouth-watering pizza from Italy'<br/><u>Image:</u> Pizza with cheese (more than 2 and greasy) and very little tomato sauce<br/><u>Colour:</u> yellow</p> |                   |               |               |  |     |     |     |     |     |     |     |    |     |                                                                                                                                                                                                                                                                                                                                                                                                                                                                     |                           |            |                   |               |               |  |     |      |     |     |     |     |     |    |     |                                                                                                                                                                                                                                                                                                                                                                                                                                                                       |                           |            |                    |               |              |  |      |      |     |      |     |     |     |    |     |
|                                 | <b>Cake</b>                                                                                                                                                                                                                                                                                                                                                                                                                                                        |                                                                                                                                                                                                                       |                                                                                                                                                                                                               |                   |               |               |  |     |     |     |     |     |     |     |    |     |                                                                                                                                                                                                                                                                                                                                                                                                                                                                     |                           |            |                   |               |               |  |     |      |     |     |     |     |     |    |     |                                                                                                                                                                                                                                                                                                                                                                                                                                                                       |                           |            |                    |               |              |  |      |      |     |      |     |     |     |    |     |
| No label (baseline and control) |                                                                                                                                                                                                                                                                                                                                                                                 |                                                                                                                                   |                                                                                                                          |                   |               |               |  |     |     |     |     |     |     |     |    |     |                                                                                                                                                                                                                                                                                                                                                                                                                                                                     |                           |            |                   |               |               |  |     |      |     |     |     |     |     |    |     |                                                                                                                                                                                                                                                                                                                                                                                                                                                                       |                           |            |                    |               |              |  |      |      |     |      |     |     |     |    |     |

|                                 |                                                                                                                                                                                                                                                                                                                                                                                                                          |                                                                                                                                                                           |                                                                                                                                                                            |                          |                      |                      |    |     |    |     |    |                                                                                                                                                                                                                                                                                                                                                                                                                           |                            |                   |                          |                      |                      |    |     |    |     |     |                                                                                                                                                                                                                                                                                                                                                                                                                             |                            |                    |                          |                      |                      |     |     |     |     |     |
|---------------------------------|--------------------------------------------------------------------------------------------------------------------------------------------------------------------------------------------------------------------------------------------------------------------------------------------------------------------------------------------------------------------------------------------------------------------------|---------------------------------------------------------------------------------------------------------------------------------------------------------------------------|----------------------------------------------------------------------------------------------------------------------------------------------------------------------------|--------------------------|----------------------|----------------------|----|-----|----|-----|----|---------------------------------------------------------------------------------------------------------------------------------------------------------------------------------------------------------------------------------------------------------------------------------------------------------------------------------------------------------------------------------------------------------------------------|----------------------------|-------------------|--------------------------|----------------------|----------------------|----|-----|----|-----|-----|-----------------------------------------------------------------------------------------------------------------------------------------------------------------------------------------------------------------------------------------------------------------------------------------------------------------------------------------------------------------------------------------------------------------------------|----------------------------|--------------------|--------------------------|----------------------|----------------------|-----|-----|-----|-----|-----|
| Multiple Traffic Light          | <p>Each 1/8 of cake (45g) contains</p> <table border="1"> <tr> <td>Energy<br/>722kJ<br/>172kcal</td> <td>Fat<br/>8g<br/>LOW</td> <td>Saturates<br/>0.6g<br/>MED</td> <td>Sugar<br/>12g<br/>HIGH</td> <td>Salt<br/>0.14g<br/>MED</td> </tr> <tr> <td>9%</td> <td>11%</td> <td>3%</td> <td>13%</td> <td>2%</td> </tr> </table> <p>of an adult's reference intake<br/>Typical values (as sold) per 100g: 1605kJ/383kcal</p> | Energy<br>722kJ<br>172kcal                                                                                                                                                | Fat<br>8g<br>LOW                                                                                                                                                           | Saturates<br>0.6g<br>MED | Sugar<br>12g<br>HIGH | Salt<br>0.14g<br>MED | 9% | 11% | 3% | 13% | 2% | <p>Each 1/8 of cake (45g) contains</p> <table border="1"> <tr> <td>Energy<br/>753kJ<br/>179kcal</td> <td>Fat<br/>8g<br/>HIGH</td> <td>Saturates<br/>1.4g<br/>MED</td> <td>Sugar<br/>17g<br/>HIGH</td> <td>Salt<br/>0.27g<br/>MED</td> </tr> <tr> <td>9%</td> <td>11%</td> <td>7%</td> <td>19%</td> <td>5%</td> </tr> </table> <p>of an adult's reference intake<br/>Typical values (as sold) per 100g: 1673kJ/399kcal</p> | Energy<br>753kJ<br>179kcal | Fat<br>8g<br>HIGH | Saturates<br>1.4g<br>MED | Sugar<br>17g<br>HIGH | Salt<br>0.27g<br>MED | 9% | 11% | 7% | 19% | 5%  | <p>Each 1/8 of cake (45g) contains</p> <table border="1"> <tr> <td>Energy<br/>815kJ<br/>196kcal</td> <td>Fat<br/>10g<br/>HIGH</td> <td>Saturates<br/>5g<br/>HIGH</td> <td>Sugar<br/>19g<br/>HIGH</td> <td>Salt<br/>0.31g<br/>MED</td> </tr> <tr> <td>10%</td> <td>15%</td> <td>25%</td> <td>21%</td> <td>5%</td> </tr> </table> <p>of an adult's reference intake<br/>Typical values (as sold) per 100g: 1810kJ/435kcal</p> | Energy<br>815kJ<br>196kcal | Fat<br>10g<br>HIGH | Saturates<br>5g<br>HIGH  | Sugar<br>19g<br>HIGH | Salt<br>0.31g<br>MED | 10% | 15% | 25% | 21% | 5%  |
| Energy<br>722kJ<br>172kcal      | Fat<br>8g<br>LOW                                                                                                                                                                                                                                                                                                                                                                                                         | Saturates<br>0.6g<br>MED                                                                                                                                                  | Sugar<br>12g<br>HIGH                                                                                                                                                       | Salt<br>0.14g<br>MED     |                      |                      |    |     |    |     |    |                                                                                                                                                                                                                                                                                                                                                                                                                           |                            |                   |                          |                      |                      |    |     |    |     |     |                                                                                                                                                                                                                                                                                                                                                                                                                             |                            |                    |                          |                      |                      |     |     |     |     |     |
| 9%                              | 11%                                                                                                                                                                                                                                                                                                                                                                                                                      | 3%                                                                                                                                                                        | 13%                                                                                                                                                                        | 2%                       |                      |                      |    |     |    |     |    |                                                                                                                                                                                                                                                                                                                                                                                                                           |                            |                   |                          |                      |                      |    |     |    |     |     |                                                                                                                                                                                                                                                                                                                                                                                                                             |                            |                    |                          |                      |                      |     |     |     |     |     |
| Energy<br>753kJ<br>179kcal      | Fat<br>8g<br>HIGH                                                                                                                                                                                                                                                                                                                                                                                                        | Saturates<br>1.4g<br>MED                                                                                                                                                  | Sugar<br>17g<br>HIGH                                                                                                                                                       | Salt<br>0.27g<br>MED     |                      |                      |    |     |    |     |    |                                                                                                                                                                                                                                                                                                                                                                                                                           |                            |                   |                          |                      |                      |    |     |    |     |     |                                                                                                                                                                                                                                                                                                                                                                                                                             |                            |                    |                          |                      |                      |     |     |     |     |     |
| 9%                              | 11%                                                                                                                                                                                                                                                                                                                                                                                                                      | 7%                                                                                                                                                                        | 19%                                                                                                                                                                        | 5%                       |                      |                      |    |     |    |     |    |                                                                                                                                                                                                                                                                                                                                                                                                                           |                            |                   |                          |                      |                      |    |     |    |     |     |                                                                                                                                                                                                                                                                                                                                                                                                                             |                            |                    |                          |                      |                      |     |     |     |     |     |
| Energy<br>815kJ<br>196kcal      | Fat<br>10g<br>HIGH                                                                                                                                                                                                                                                                                                                                                                                                       | Saturates<br>5g<br>HIGH                                                                                                                                                   | Sugar<br>19g<br>HIGH                                                                                                                                                       | Salt<br>0.31g<br>MED     |                      |                      |    |     |    |     |    |                                                                                                                                                                                                                                                                                                                                                                                                                           |                            |                   |                          |                      |                      |    |     |    |     |     |                                                                                                                                                                                                                                                                                                                                                                                                                             |                            |                    |                          |                      |                      |     |     |     |     |     |
| 10%                             | 15%                                                                                                                                                                                                                                                                                                                                                                                                                      | 25%                                                                                                                                                                       | 21%                                                                                                                                                                        | 5%                       |                      |                      |    |     |    |     |    |                                                                                                                                                                                                                                                                                                                                                                                                                           |                            |                   |                          |                      |                      |    |     |    |     |     |                                                                                                                                                                                                                                                                                                                                                                                                                             |                            |                    |                          |                      |                      |     |     |     |     |     |
| Nutri-Score                     |                                                                                                                                                                                                                                                                                                                                         |                                                                                          |                                                                                         |                          |                      |                      |    |     |    |     |    |                                                                                                                                                                                                                                                                                                                                                                                                                           |                            |                   |                          |                      |                      |    |     |    |     |     |                                                                                                                                                                                                                                                                                                                                                                                                                             |                            |                    |                          |                      |                      |     |     |     |     |     |
| Warning label                   |                                                                                                                                                                                                                                                                                                                                         |                                                                                          |                                                                                         |                          |                      |                      |    |     |    |     |    |                                                                                                                                                                                                                                                                                                                                                                                                                           |                            |                   |                          |                      |                      |    |     |    |     |     |                                                                                                                                                                                                                                                                                                                                                                                                                             |                            |                    |                          |                      |                      |     |     |     |     |     |
| Positive Choice tick            | N/A                                                                                                                                                                                                                                                                                                                                                                                                                      | N/A                                                                                                                                                                       | N/A                                                                                                                                                                        |                          |                      |                      |    |     |    |     |    |                                                                                                                                                                                                                                                                                                                                                                                                                           |                            |                   |                          |                      |                      |    |     |    |     |     |                                                                                                                                                                                                                                                                                                                                                                                                                             |                            |                    |                          |                      |                      |     |     |     |     |     |
| Design features                 | <p><u>Description:</u> 'Fruit cake' and 'Our delicious fruit cake'<br/> <u>Image:</u> Plain loaf cake with fruit visible- no icing<br/> <u>Colour:</u> Beige</p>                                                                                                                                                                                                                                                         | <p><u>Description:</u> 'Iced lemon cake' and 'Our delicious lemon cake'<br/> <u>Image:</u> Lemon cake loaf covered in icing and lemon zest<br/> <u>Colour:</u> Yellow</p> | <p><u>Description:</u> 'Chocolate cake' and 'Our delicious chocolate cake'<br/> <u>Image:</u> Chocolate cake with chocolate icing and chunks<br/> <u>Colour:</u> Brown</p> |                          |                      |                      |    |     |    |     |    |                                                                                                                                                                                                                                                                                                                                                                                                                           |                            |                   |                          |                      |                      |    |     |    |     |     |                                                                                                                                                                                                                                                                                                                                                                                                                             |                            |                    |                          |                      |                      |     |     |     |     |     |
| <b>Crisps</b>                   |                                                                                                                                                                                                                                                                                                                                                                                                                          |                                                                                                                                                                           |                                                                                                                                                                            |                          |                      |                      |    |     |    |     |    |                                                                                                                                                                                                                                                                                                                                                                                                                           |                            |                   |                          |                      |                      |    |     |    |     |     |                                                                                                                                                                                                                                                                                                                                                                                                                             |                            |                    |                          |                      |                      |     |     |     |     |     |
| No label (baseline and control) |                                                                                                                                                                                                                                                                                                                                       |                                                                                        |                                                                                       |                          |                      |                      |    |     |    |     |    |                                                                                                                                                                                                                                                                                                                                                                                                                           |                            |                   |                          |                      |                      |    |     |    |     |     |                                                                                                                                                                                                                                                                                                                                                                                                                             |                            |                    |                          |                      |                      |     |     |     |     |     |
| Multiple Traffic Light          | <p>Each bag (25g) contains</p> <table border="1"> <tr> <td>Energy<br/>413kJ<br/>99kcal</td> <td>Fat<br/>1.9g<br/>MED</td> <td>Saturates<br/>0.3g<br/>LOW</td> <td>Sugar<br/>0.1g<br/>LOW</td> <td>Salt<br/>0.3g<br/>MED</td> </tr> <tr> <td>5%</td> <td>3%</td> <td>1%</td> <td>&lt;1%</td> <td>4%</td> </tr> </table> <p>of an adult's reference intake<br/>Typical values (as sold) per 100g: 1653kJ/395kcal</p>       | Energy<br>413kJ<br>99kcal                                                                                                                                                 | Fat<br>1.9g<br>MED                                                                                                                                                         | Saturates<br>0.3g<br>LOW | Sugar<br>0.1g<br>LOW | Salt<br>0.3g<br>MED  | 5% | 3%  | 1% | <1% | 4% | <p>Each bag (25g) contains</p> <table border="1"> <tr> <td>Energy<br/>456kJ<br/>109kcal</td> <td>Fat<br/>4g<br/>MED</td> <td>Saturates<br/>0.6g<br/>LOW</td> <td>Sugar<br/>0.3g<br/>LOW</td> <td>Salt<br/>0.6g<br/>HIGH</td> </tr> <tr> <td>5%</td> <td>6%</td> <td>2%</td> <td>&lt;1%</td> <td>10%</td> </tr> </table> <p>of an adult's reference intake<br/>Typical values (as sold) per 100g: 1822kJ/434kcal</p>       | Energy<br>456kJ<br>109kcal | Fat<br>4g<br>MED  | Saturates<br>0.6g<br>LOW | Sugar<br>0.3g<br>LOW | Salt<br>0.6g<br>HIGH | 5% | 6%  | 2% | <1% | 10% | <p>Each bag (25g) contains</p> <table border="1"> <tr> <td>Energy<br/>530kJ<br/>127kcal</td> <td>Fat<br/>7g<br/>HIGH</td> <td>Saturates<br/>0.9g<br/>MED</td> <td>Sugar<br/>1.3g<br/>MED</td> <td>Salt<br/>0.7g<br/>HIGH</td> </tr> <tr> <td>6%</td> <td>10%</td> <td>4%</td> <td>1%</td> <td>11%</td> </tr> </table> <p>of an adult's reference intake<br/>Typical values (as sold) per 100g: 2119kJ/507kcal</p>           | Energy<br>530kJ<br>127kcal | Fat<br>7g<br>HIGH  | Saturates<br>0.9g<br>MED | Sugar<br>1.3g<br>MED | Salt<br>0.7g<br>HIGH | 6%  | 10% | 4%  | 1%  | 11% |
| Energy<br>413kJ<br>99kcal       | Fat<br>1.9g<br>MED                                                                                                                                                                                                                                                                                                                                                                                                       | Saturates<br>0.3g<br>LOW                                                                                                                                                  | Sugar<br>0.1g<br>LOW                                                                                                                                                       | Salt<br>0.3g<br>MED      |                      |                      |    |     |    |     |    |                                                                                                                                                                                                                                                                                                                                                                                                                           |                            |                   |                          |                      |                      |    |     |    |     |     |                                                                                                                                                                                                                                                                                                                                                                                                                             |                            |                    |                          |                      |                      |     |     |     |     |     |
| 5%                              | 3%                                                                                                                                                                                                                                                                                                                                                                                                                       | 1%                                                                                                                                                                        | <1%                                                                                                                                                                        | 4%                       |                      |                      |    |     |    |     |    |                                                                                                                                                                                                                                                                                                                                                                                                                           |                            |                   |                          |                      |                      |    |     |    |     |     |                                                                                                                                                                                                                                                                                                                                                                                                                             |                            |                    |                          |                      |                      |     |     |     |     |     |
| Energy<br>456kJ<br>109kcal      | Fat<br>4g<br>MED                                                                                                                                                                                                                                                                                                                                                                                                         | Saturates<br>0.6g<br>LOW                                                                                                                                                  | Sugar<br>0.3g<br>LOW                                                                                                                                                       | Salt<br>0.6g<br>HIGH     |                      |                      |    |     |    |     |    |                                                                                                                                                                                                                                                                                                                                                                                                                           |                            |                   |                          |                      |                      |    |     |    |     |     |                                                                                                                                                                                                                                                                                                                                                                                                                             |                            |                    |                          |                      |                      |     |     |     |     |     |
| 5%                              | 6%                                                                                                                                                                                                                                                                                                                                                                                                                       | 2%                                                                                                                                                                        | <1%                                                                                                                                                                        | 10%                      |                      |                      |    |     |    |     |    |                                                                                                                                                                                                                                                                                                                                                                                                                           |                            |                   |                          |                      |                      |    |     |    |     |     |                                                                                                                                                                                                                                                                                                                                                                                                                             |                            |                    |                          |                      |                      |     |     |     |     |     |
| Energy<br>530kJ<br>127kcal      | Fat<br>7g<br>HIGH                                                                                                                                                                                                                                                                                                                                                                                                        | Saturates<br>0.9g<br>MED                                                                                                                                                  | Sugar<br>1.3g<br>MED                                                                                                                                                       | Salt<br>0.7g<br>HIGH     |                      |                      |    |     |    |     |    |                                                                                                                                                                                                                                                                                                                                                                                                                           |                            |                   |                          |                      |                      |    |     |    |     |     |                                                                                                                                                                                                                                                                                                                                                                                                                             |                            |                    |                          |                      |                      |     |     |     |     |     |
| 6%                              | 10%                                                                                                                                                                                                                                                                                                                                                                                                                      | 4%                                                                                                                                                                        | 1%                                                                                                                                                                         | 11%                      |                      |                      |    |     |    |     |    |                                                                                                                                                                                                                                                                                                                                                                                                                           |                            |                   |                          |                      |                      |    |     |    |     |     |                                                                                                                                                                                                                                                                                                                                                                                                                             |                            |                    |                          |                      |                      |     |     |     |     |     |
| Nutri-Score                     |                                                                                                                                                                                                                                                                                                                                       |                                                                                        |                                                                                       |                          |                      |                      |    |     |    |     |    |                                                                                                                                                                                                                                                                                                                                                                                                                           |                            |                   |                          |                      |                      |    |     |    |     |     |                                                                                                                                                                                                                                                                                                                                                                                                                             |                            |                    |                          |                      |                      |     |     |     |     |     |
| Warning label                   |                                                                                                                                                                                                                                                                                                                                       |                                                                                        |                                                                                       |                          |                      |                      |    |     |    |     |    |                                                                                                                                                                                                                                                                                                                                                                                                                           |                            |                   |                          |                      |                      |    |     |    |     |     |                                                                                                                                                                                                                                                                                                                                                                                                                             |                            |                    |                          |                      |                      |     |     |     |     |     |
| Positive Choice tick            | N/A                                                                                                                                                                                                                                                                                                                                                                                                                      | N/A                                                                                                                                                                       | N/A                                                                                                                                                                        |                          |                      |                      |    |     |    |     |    |                                                                                                                                                                                                                                                                                                                                                                                                                           |                            |                   |                          |                      |                      |    |     |    |     |     |                                                                                                                                                                                                                                                                                                                                                                                                                             |                            |                    |                          |                      |                      |     |     |     |     |     |

|                                        |                                                                                                                                                                                                                                                                                                                                                                                                                               |                                                                                                                           |                                                                                                                                                                                     |                          |                       |                      |    |     |    |     |    |                                                                                                                                                                                                                                                                                                                                                                                                                                    |                            |                    |                           |                       |                      |    |    |     |     |     |                                                                                                                                                                                                                                                                                                                                                                                                                                  |                            |                    |                           |                      |                      |     |     |     |     |    |
|----------------------------------------|-------------------------------------------------------------------------------------------------------------------------------------------------------------------------------------------------------------------------------------------------------------------------------------------------------------------------------------------------------------------------------------------------------------------------------|---------------------------------------------------------------------------------------------------------------------------|-------------------------------------------------------------------------------------------------------------------------------------------------------------------------------------|--------------------------|-----------------------|----------------------|----|-----|----|-----|----|------------------------------------------------------------------------------------------------------------------------------------------------------------------------------------------------------------------------------------------------------------------------------------------------------------------------------------------------------------------------------------------------------------------------------------|----------------------------|--------------------|---------------------------|-----------------------|----------------------|----|----|-----|-----|-----|----------------------------------------------------------------------------------------------------------------------------------------------------------------------------------------------------------------------------------------------------------------------------------------------------------------------------------------------------------------------------------------------------------------------------------|----------------------------|--------------------|---------------------------|----------------------|----------------------|-----|-----|-----|-----|----|
| <b>Design features</b>                 | Description: 'Lightly salted baked potato crisps' – italicised font<br><u>Image</u> : pile of crisps<br><u>Colour</u> : light yellow and white                                                                                                                                                                                                                                                                                | Description: 'lightly salted potato crisps'- standard font<br><u>Image</u> : Potatoes in a basket<br><u>Colour</u> : blue | Description: 'Sweet chilli potato crisps'- bold font<br><u>Image</u> : Large crisps<br><u>Colour</u> : Bright red                                                                   |                          |                       |                      |    |     |    |     |    |                                                                                                                                                                                                                                                                                                                                                                                                                                    |                            |                    |                           |                       |                      |    |    |     |     |     |                                                                                                                                                                                                                                                                                                                                                                                                                                  |                            |                    |                           |                      |                      |     |     |     |     |    |
|                                        | <b>Yoghurt</b>                                                                                                                                                                                                                                                                                                                                                                                                                |                                                                                                                           |                                                                                                                                                                                     |                          |                       |                      |    |     |    |     |    |                                                                                                                                                                                                                                                                                                                                                                                                                                    |                            |                    |                           |                       |                      |    |    |     |     |     |                                                                                                                                                                                                                                                                                                                                                                                                                                  |                            |                    |                           |                      |                      |     |     |     |     |    |
| <b>No label (baseline and control)</b> |                                                                                                                                                                                                                                                                                                                                              |                                         |                                                                                                  |                          |                       |                      |    |     |    |     |    |                                                                                                                                                                                                                                                                                                                                                                                                                                    |                            |                    |                           |                       |                      |    |    |     |     |     |                                                                                                                                                                                                                                                                                                                                                                                                                                  |                            |                    |                           |                      |                      |     |     |     |     |    |
| <b>Multiple Traffic Light</b>          | <p>Each pot (125g) contains</p> <table border="1"> <tr> <td>Energy<br/>206kJ<br/>70kcal</td> <td>Fat<br/>0.1g<br/>LOW</td> <td>Saturates<br/>0g<br/>LOW</td> <td>Sugar<br/>10.9g<br/>MED</td> <td>Salt<br/>0.25g<br/>LOW</td> </tr> <tr> <td>4%</td> <td>&lt;1%</td> <td>0%</td> <td>12%</td> <td>4%</td> </tr> </table> <p>of an adult's reference intake<br/>Typical values (as sold) per 100g: 239kJ/56kcal</p>            | Energy<br>206kJ<br>70kcal                                                                                                 | Fat<br>0.1g<br>LOW                                                                                                                                                                  | Saturates<br>0g<br>LOW   | Sugar<br>10.9g<br>MED | Salt<br>0.25g<br>LOW | 4% | <1% | 0% | 12% | 4% | <p>Each pot (125g) contains</p> <table border="1"> <tr> <td>Energy<br/>562kJ<br/>133kcal</td> <td>Fat<br/>6.5g<br/>MED</td> <td>Saturates<br/>6.0g<br/>HIGH</td> <td>Sugar<br/>11.3g<br/>MED</td> <td>Salt<br/>0.13g<br/>LOW</td> </tr> <tr> <td>7%</td> <td>9%</td> <td>30%</td> <td>13%</td> <td>2%</td> </tr> </table> <p>of an adult's reference intake<br/>Typical values (as sold) per 100g: 450kJ/107kcal</p>               | Energy<br>562kJ<br>133kcal | Fat<br>6.5g<br>MED | Saturates<br>6.0g<br>HIGH | Sugar<br>11.3g<br>MED | Salt<br>0.13g<br>LOW | 7% | 9% | 30% | 13% | 2%  | <p>Each pot (125g) contains</p> <table border="1"> <tr> <td>Energy<br/>646kJ<br/>204kcal</td> <td>Fat<br/>9.3g<br/>MED</td> <td>Saturates<br/>6.0g<br/>HIGH</td> <td>Sugar<br/>27g<br/>HIGH</td> <td>Salt<br/>0.25g<br/>LOW</td> </tr> <tr> <td>10%</td> <td>13%</td> <td>30%</td> <td>30%</td> <td>4%</td> </tr> </table> <p>of an adult's reference intake<br/>Typical values (as sold) per 100g: 707kJ/169kcal</p>            | Energy<br>646kJ<br>204kcal | Fat<br>9.3g<br>MED | Saturates<br>6.0g<br>HIGH | Sugar<br>27g<br>HIGH | Salt<br>0.25g<br>LOW | 10% | 13% | 30% | 30% | 4% |
| Energy<br>206kJ<br>70kcal              | Fat<br>0.1g<br>LOW                                                                                                                                                                                                                                                                                                                                                                                                            | Saturates<br>0g<br>LOW                                                                                                    | Sugar<br>10.9g<br>MED                                                                                                                                                               | Salt<br>0.25g<br>LOW     |                       |                      |    |     |    |     |    |                                                                                                                                                                                                                                                                                                                                                                                                                                    |                            |                    |                           |                       |                      |    |    |     |     |     |                                                                                                                                                                                                                                                                                                                                                                                                                                  |                            |                    |                           |                      |                      |     |     |     |     |    |
| 4%                                     | <1%                                                                                                                                                                                                                                                                                                                                                                                                                           | 0%                                                                                                                        | 12%                                                                                                                                                                                 | 4%                       |                       |                      |    |     |    |     |    |                                                                                                                                                                                                                                                                                                                                                                                                                                    |                            |                    |                           |                       |                      |    |    |     |     |     |                                                                                                                                                                                                                                                                                                                                                                                                                                  |                            |                    |                           |                      |                      |     |     |     |     |    |
| Energy<br>562kJ<br>133kcal             | Fat<br>6.5g<br>MED                                                                                                                                                                                                                                                                                                                                                                                                            | Saturates<br>6.0g<br>HIGH                                                                                                 | Sugar<br>11.3g<br>MED                                                                                                                                                               | Salt<br>0.13g<br>LOW     |                       |                      |    |     |    |     |    |                                                                                                                                                                                                                                                                                                                                                                                                                                    |                            |                    |                           |                       |                      |    |    |     |     |     |                                                                                                                                                                                                                                                                                                                                                                                                                                  |                            |                    |                           |                      |                      |     |     |     |     |    |
| 7%                                     | 9%                                                                                                                                                                                                                                                                                                                                                                                                                            | 30%                                                                                                                       | 13%                                                                                                                                                                                 | 2%                       |                       |                      |    |     |    |     |    |                                                                                                                                                                                                                                                                                                                                                                                                                                    |                            |                    |                           |                       |                      |    |    |     |     |     |                                                                                                                                                                                                                                                                                                                                                                                                                                  |                            |                    |                           |                      |                      |     |     |     |     |    |
| Energy<br>646kJ<br>204kcal             | Fat<br>9.3g<br>MED                                                                                                                                                                                                                                                                                                                                                                                                            | Saturates<br>6.0g<br>HIGH                                                                                                 | Sugar<br>27g<br>HIGH                                                                                                                                                                | Salt<br>0.25g<br>LOW     |                       |                      |    |     |    |     |    |                                                                                                                                                                                                                                                                                                                                                                                                                                    |                            |                    |                           |                       |                      |    |    |     |     |     |                                                                                                                                                                                                                                                                                                                                                                                                                                  |                            |                    |                           |                      |                      |     |     |     |     |    |
| 10%                                    | 13%                                                                                                                                                                                                                                                                                                                                                                                                                           | 30%                                                                                                                       | 30%                                                                                                                                                                                 | 4%                       |                       |                      |    |     |    |     |    |                                                                                                                                                                                                                                                                                                                                                                                                                                    |                            |                    |                           |                       |                      |    |    |     |     |     |                                                                                                                                                                                                                                                                                                                                                                                                                                  |                            |                    |                           |                      |                      |     |     |     |     |    |
| <b>Nutri-Score</b>                     |                                                                                                                                                                                                                                                                                                                                              |                                         |                                                                                                  |                          |                       |                      |    |     |    |     |    |                                                                                                                                                                                                                                                                                                                                                                                                                                    |                            |                    |                           |                       |                      |    |    |     |     |     |                                                                                                                                                                                                                                                                                                                                                                                                                                  |                            |                    |                           |                      |                      |     |     |     |     |    |
| <b>Warning label</b>                   |                                                                                                                                                                                                                                                                                                                                                                                                                               |                                        |                                                                                                 |                          |                       |                      |    |     |    |     |    |                                                                                                                                                                                                                                                                                                                                                                                                                                    |                            |                    |                           |                       |                      |    |    |     |     |     |                                                                                                                                                                                                                                                                                                                                                                                                                                  |                            |                    |                           |                      |                      |     |     |     |     |    |
| <b>Positive Choice tick</b>            |                                                                                                                                                                                                                                                                                                                                            |                                                                                                                           |                                                                                                                                                                                     |                          |                       |                      |    |     |    |     |    |                                                                                                                                                                                                                                                                                                                                                                                                                                    |                            |                    |                           |                       |                      |    |    |     |     |     |                                                                                                                                                                                                                                                                                                                                                                                                                                  |                            |                    |                           |                      |                      |     |     |     |     |    |
| <b>Design features</b>                 | Description: 'Strawberry yoghurt'<br><u>Image</u> : yoghurt with some strawberry mixed in a yoghurt pot and strawberries in the background<br><u>Colour</u> : white                                                                                                                                                                                                                                                           | Description: 'Strawberry yoghurt'<br><u>Image</u> : yoghurt with strawberries in a bowl<br><u>Colour</u> : dull red       | Description: 'Greek yoghurt with a thick strawberry layer'<br><u>Image</u> : yoghurt with strawberries on top and strawberry compote layer in glasses<br><u>Colour</u> : bright red |                          |                       |                      |    |     |    |     |    |                                                                                                                                                                                                                                                                                                                                                                                                                                    |                            |                    |                           |                       |                      |    |    |     |     |     |                                                                                                                                                                                                                                                                                                                                                                                                                                  |                            |                    |                           |                      |                      |     |     |     |     |    |
|                                        | <b>Breakfast cereal</b>                                                                                                                                                                                                                                                                                                                                                                                                       |                                                                                                                           |                                                                                                                                                                                     |                          |                       |                      |    |     |    |     |    |                                                                                                                                                                                                                                                                                                                                                                                                                                    |                            |                    |                           |                       |                      |    |    |     |     |     |                                                                                                                                                                                                                                                                                                                                                                                                                                  |                            |                    |                           |                      |                      |     |     |     |     |    |
| <b>No label (baseline and control)</b> |                                                                                                                                                                                                                                                                                                                                            |                                       |                                                                                                |                          |                       |                      |    |     |    |     |    |                                                                                                                                                                                                                                                                                                                                                                                                                                    |                            |                    |                           |                       |                      |    |    |     |     |     |                                                                                                                                                                                                                                                                                                                                                                                                                                  |                            |                    |                           |                      |                      |     |     |     |     |    |
| <b>Multiple Traffic Light</b>          | <p>Each 45g serving (without milk) contains</p> <table border="1"> <tr> <td>Energy<br/>713kJ<br/>169kcal</td> <td>Fat<br/>2.8g<br/>MED</td> <td>Saturates<br/>0.4g<br/>LOW</td> <td>Sugar<br/>7g<br/>MED</td> <td>Salt<br/>0.13g<br/>LOW</td> </tr> <tr> <td>8%</td> <td>4%</td> <td>2%</td> <td>8%</td> <td>2%</td> </tr> </table> <p>of an adult's reference intake<br/>Typical values (as sold) per 100g: 156kJ/37kcal</p> | Energy<br>713kJ<br>169kcal                                                                                                | Fat<br>2.8g<br>MED                                                                                                                                                                  | Saturates<br>0.4g<br>LOW | Sugar<br>7g<br>MED    | Salt<br>0.13g<br>LOW | 8% | 4%  | 2% | 8%  | 2% | <p>Each 45g serving (without milk) contains</p> <table border="1"> <tr> <td>Energy<br/>779kJ<br/>185kcal</td> <td>Fat<br/>6g<br/>MED</td> <td>Saturates<br/>1.0g<br/>MED</td> <td>Sugar<br/>11g<br/>HIGH</td> <td>Salt<br/>0.01g<br/>LOW</td> </tr> <tr> <td>9%</td> <td>8%</td> <td>5%</td> <td>12%</td> <td>&lt;1%</td> </tr> </table> <p>of an adult's reference intake<br/>Typical values (as sold) per 100g: 172kJ/41kcal</p> | Energy<br>779kJ<br>185kcal | Fat<br>6g<br>MED   | Saturates<br>1.0g<br>MED  | Sugar<br>11g<br>HIGH  | Salt<br>0.01g<br>LOW | 9% | 8% | 5%  | 12% | <1% | <p>Each 45g serving (without milk) contains</p> <table border="1"> <tr> <td>Energy<br/>800kJ<br/>191kcal</td> <td>Fat<br/>8g<br/>HIGH</td> <td>Saturates<br/>1.6g<br/>MED</td> <td>Sugar<br/>11g<br/>HIGH</td> <td>Salt<br/>0.5g<br/>MED</td> </tr> <tr> <td>10%</td> <td>11%</td> <td>8%</td> <td>12%</td> <td>8%</td> </tr> </table> <p>of an adult's reference intake<br/>Typical values (as sold) per 100g: 184kJ/43kcal</p> | Energy<br>800kJ<br>191kcal | Fat<br>8g<br>HIGH  | Saturates<br>1.6g<br>MED  | Sugar<br>11g<br>HIGH | Salt<br>0.5g<br>MED  | 10% | 11% | 8%  | 12% | 8% |
| Energy<br>713kJ<br>169kcal             | Fat<br>2.8g<br>MED                                                                                                                                                                                                                                                                                                                                                                                                            | Saturates<br>0.4g<br>LOW                                                                                                  | Sugar<br>7g<br>MED                                                                                                                                                                  | Salt<br>0.13g<br>LOW     |                       |                      |    |     |    |     |    |                                                                                                                                                                                                                                                                                                                                                                                                                                    |                            |                    |                           |                       |                      |    |    |     |     |     |                                                                                                                                                                                                                                                                                                                                                                                                                                  |                            |                    |                           |                      |                      |     |     |     |     |    |
| 8%                                     | 4%                                                                                                                                                                                                                                                                                                                                                                                                                            | 2%                                                                                                                        | 8%                                                                                                                                                                                  | 2%                       |                       |                      |    |     |    |     |    |                                                                                                                                                                                                                                                                                                                                                                                                                                    |                            |                    |                           |                       |                      |    |    |     |     |     |                                                                                                                                                                                                                                                                                                                                                                                                                                  |                            |                    |                           |                      |                      |     |     |     |     |    |
| Energy<br>779kJ<br>185kcal             | Fat<br>6g<br>MED                                                                                                                                                                                                                                                                                                                                                                                                              | Saturates<br>1.0g<br>MED                                                                                                  | Sugar<br>11g<br>HIGH                                                                                                                                                                | Salt<br>0.01g<br>LOW     |                       |                      |    |     |    |     |    |                                                                                                                                                                                                                                                                                                                                                                                                                                    |                            |                    |                           |                       |                      |    |    |     |     |     |                                                                                                                                                                                                                                                                                                                                                                                                                                  |                            |                    |                           |                      |                      |     |     |     |     |    |
| 9%                                     | 8%                                                                                                                                                                                                                                                                                                                                                                                                                            | 5%                                                                                                                        | 12%                                                                                                                                                                                 | <1%                      |                       |                      |    |     |    |     |    |                                                                                                                                                                                                                                                                                                                                                                                                                                    |                            |                    |                           |                       |                      |    |    |     |     |     |                                                                                                                                                                                                                                                                                                                                                                                                                                  |                            |                    |                           |                      |                      |     |     |     |     |    |
| Energy<br>800kJ<br>191kcal             | Fat<br>8g<br>HIGH                                                                                                                                                                                                                                                                                                                                                                                                             | Saturates<br>1.6g<br>MED                                                                                                  | Sugar<br>11g<br>HIGH                                                                                                                                                                | Salt<br>0.5g<br>MED      |                       |                      |    |     |    |     |    |                                                                                                                                                                                                                                                                                                                                                                                                                                    |                            |                    |                           |                       |                      |    |    |     |     |     |                                                                                                                                                                                                                                                                                                                                                                                                                                  |                            |                    |                           |                      |                      |     |     |     |     |    |
| 10%                                    | 11%                                                                                                                                                                                                                                                                                                                                                                                                                           | 8%                                                                                                                        | 12%                                                                                                                                                                                 | 8%                       |                       |                      |    |     |    |     |    |                                                                                                                                                                                                                                                                                                                                                                                                                                    |                            |                    |                           |                       |                      |    |    |     |     |     |                                                                                                                                                                                                                                                                                                                                                                                                                                  |                            |                    |                           |                      |                      |     |     |     |     |    |

|                                     |                                                                                                                                                                                                                                                                                                                                                                                                                                   |                                                                                                                                                                                                                                                    |                                                                                                                                                       |                          |                      |                      |    |    |    |     |    |                                                                                                                                                                                                                                                                                                                                                                                                                                      |                            |                    |                          |                        |                      |    |    |     |     |    |                                                                                                                                                                                                                                                                                                                                                                                                                                       |                            |                    |                           |                        |                      |    |    |     |     |    |
|-------------------------------------|-----------------------------------------------------------------------------------------------------------------------------------------------------------------------------------------------------------------------------------------------------------------------------------------------------------------------------------------------------------------------------------------------------------------------------------|----------------------------------------------------------------------------------------------------------------------------------------------------------------------------------------------------------------------------------------------------|-------------------------------------------------------------------------------------------------------------------------------------------------------|--------------------------|----------------------|----------------------|----|----|----|-----|----|--------------------------------------------------------------------------------------------------------------------------------------------------------------------------------------------------------------------------------------------------------------------------------------------------------------------------------------------------------------------------------------------------------------------------------------|----------------------------|--------------------|--------------------------|------------------------|----------------------|----|----|-----|-----|----|---------------------------------------------------------------------------------------------------------------------------------------------------------------------------------------------------------------------------------------------------------------------------------------------------------------------------------------------------------------------------------------------------------------------------------------|----------------------------|--------------------|---------------------------|------------------------|----------------------|----|----|-----|-----|----|
| Nutri-Score                         |                                                                                                                                                                                                                                                                                                                                                  |                                                                                                                                                                   |                                                                    |                          |                      |                      |    |    |    |     |    |                                                                                                                                                                                                                                                                                                                                                                                                                                      |                            |                    |                          |                        |                      |    |    |     |     |    |                                                                                                                                                                                                                                                                                                                                                                                                                                       |                            |                    |                           |                        |                      |    |    |     |     |    |
| Warning label                       |                                                                                                                                                                                                                                                                                                                                                                                                                                   |                                                                                                                                                                   |                                                                    |                          |                      |                      |    |    |    |     |    |                                                                                                                                                                                                                                                                                                                                                                                                                                      |                            |                    |                          |                        |                      |    |    |     |     |    |                                                                                                                                                                                                                                                                                                                                                                                                                                       |                            |                    |                           |                        |                      |    |    |     |     |    |
| Positive Choice tick                |                                                                                                                                                                                                                                                                                                                                                  |                                                                                                                                                                                                                                                    |                                                                                                                                                       |                          |                      |                      |    |    |    |     |    |                                                                                                                                                                                                                                                                                                                                                                                                                                      |                            |                    |                          |                        |                      |    |    |     |     |    |                                                                                                                                                                                                                                                                                                                                                                                                                                       |                            |                    |                           |                        |                      |    |    |     |     |    |
| Design features                     | <p>Description: 'Muesli' and 'Our delicious grainy breakfast cereal'<br/>All: size=740g<br/><u>Image</u>: Muesli with plenty of wholegrain flakes and animated oats/nuts<br/><u>Colour</u>: light blue</p>                                                                                                                                                                                                                        | <p>Description: 'Muesli' and 'Our delicious fruity and nutty breakfast cereal'<br/><u>Image</u>: muesli in a bowl with more fruit and what could be sugar frosting and mountains to indicate swiss style muesli<br/><u>Colour</u>: dull orange</p> | <p>Description: 'Granola' and 'Our delicious fruity and nutty breakfast cereal'<br/><u>Image</u>: granola in a bowl<br/><u>Colour</u>: dark brown</p> |                          |                      |                      |    |    |    |     |    |                                                                                                                                                                                                                                                                                                                                                                                                                                      |                            |                    |                          |                        |                      |    |    |     |     |    |                                                                                                                                                                                                                                                                                                                                                                                                                                       |                            |                    |                           |                        |                      |    |    |     |     |    |
| <b>Instant hot chocolate powder</b> |                                                                                                                                                                                                                                                                                                                                                                                                                                   |                                                                                                                                                                                                                                                    |                                                                                                                                                       |                          |                      |                      |    |    |    |     |    |                                                                                                                                                                                                                                                                                                                                                                                                                                      |                            |                    |                          |                        |                      |    |    |     |     |    |                                                                                                                                                                                                                                                                                                                                                                                                                                       |                            |                    |                           |                        |                      |    |    |     |     |    |
| No label (baseline and control)     |                                                                                                                                                                                                                                                                                                                                                |                                                                                                                                                                 |                                                                  |                          |                      |                      |    |    |    |     |    |                                                                                                                                                                                                                                                                                                                                                                                                                                      |                            |                    |                          |                        |                      |    |    |     |     |    |                                                                                                                                                                                                                                                                                                                                                                                                                                       |                            |                    |                           |                        |                      |    |    |     |     |    |
| Multiple Traffic Light              | <p>Per 30g serving (in 200ml hot water)</p> <table border="1"> <tr> <td>Energy<br/>422kJ<br/>101kcal</td> <td>Fat<br/>1.8g<br/>LOW</td> <td>Saturated<br/>1.1g<br/>LOW</td> <td>Sugar<br/>9.0g<br/>MED</td> <td>Salt<br/>0.13g<br/>LOW</td> </tr> <tr> <td>5%</td> <td>3%</td> <td>5%</td> <td>11%</td> <td>2%</td> </tr> </table> <p>of an adult's reference intake<br/>Typical values (as consumed) per 100ml: 154kJ/34kcal</p> | Energy<br>422kJ<br>101kcal                                                                                                                                                                                                                         | Fat<br>1.8g<br>LOW                                                                                                                                    | Saturated<br>1.1g<br>LOW | Sugar<br>9.0g<br>MED | Salt<br>0.13g<br>LOW | 5% | 3% | 5% | 11% | 2% | <p>Per 30g serving (in 200ml hot water)</p> <table border="1"> <tr> <td>Energy<br/>614kJ<br/>145kcal</td> <td>Fat<br/>2.8g<br/>LOW</td> <td>Saturated<br/>2.3g<br/>MED</td> <td>Sugar<br/>22.3g<br/>HIGH</td> <td>Salt<br/>0.41g<br/>LOW</td> </tr> <tr> <td>7%</td> <td>4%</td> <td>12%</td> <td>25%</td> <td>7%</td> </tr> </table> <p>of an adult's reference intake<br/>Typical values (as consumed) per 100ml: 267kJ/63kcal</p> | Energy<br>614kJ<br>145kcal | Fat<br>2.8g<br>LOW | Saturated<br>2.3g<br>MED | Sugar<br>22.3g<br>HIGH | Salt<br>0.41g<br>LOW | 7% | 4% | 12% | 25% | 7% | <p>Per 30g serving (in 200ml hot water)</p> <table border="1"> <tr> <td>Energy<br/>529kJ<br/>125kcal</td> <td>Fat<br/>3.7g<br/>MED</td> <td>Saturated<br/>3.0g<br/>HIGH</td> <td>Sugar<br/>16.6g<br/>HIGH</td> <td>Salt<br/>0.55g<br/>LOW</td> </tr> <tr> <td>6%</td> <td>5%</td> <td>15%</td> <td>18%</td> <td>9%</td> </tr> </table> <p>of an adult's reference intake<br/>Typical values (as consumed) per 100ml: 225kJ/54kcal</p> | Energy<br>529kJ<br>125kcal | Fat<br>3.7g<br>MED | Saturated<br>3.0g<br>HIGH | Sugar<br>16.6g<br>HIGH | Salt<br>0.55g<br>LOW | 6% | 5% | 15% | 18% | 9% |
| Energy<br>422kJ<br>101kcal          | Fat<br>1.8g<br>LOW                                                                                                                                                                                                                                                                                                                                                                                                                | Saturated<br>1.1g<br>LOW                                                                                                                                                                                                                           | Sugar<br>9.0g<br>MED                                                                                                                                  | Salt<br>0.13g<br>LOW     |                      |                      |    |    |    |     |    |                                                                                                                                                                                                                                                                                                                                                                                                                                      |                            |                    |                          |                        |                      |    |    |     |     |    |                                                                                                                                                                                                                                                                                                                                                                                                                                       |                            |                    |                           |                        |                      |    |    |     |     |    |
| 5%                                  | 3%                                                                                                                                                                                                                                                                                                                                                                                                                                | 5%                                                                                                                                                                                                                                                 | 11%                                                                                                                                                   | 2%                       |                      |                      |    |    |    |     |    |                                                                                                                                                                                                                                                                                                                                                                                                                                      |                            |                    |                          |                        |                      |    |    |     |     |    |                                                                                                                                                                                                                                                                                                                                                                                                                                       |                            |                    |                           |                        |                      |    |    |     |     |    |
| Energy<br>614kJ<br>145kcal          | Fat<br>2.8g<br>LOW                                                                                                                                                                                                                                                                                                                                                                                                                | Saturated<br>2.3g<br>MED                                                                                                                                                                                                                           | Sugar<br>22.3g<br>HIGH                                                                                                                                | Salt<br>0.41g<br>LOW     |                      |                      |    |    |    |     |    |                                                                                                                                                                                                                                                                                                                                                                                                                                      |                            |                    |                          |                        |                      |    |    |     |     |    |                                                                                                                                                                                                                                                                                                                                                                                                                                       |                            |                    |                           |                        |                      |    |    |     |     |    |
| 7%                                  | 4%                                                                                                                                                                                                                                                                                                                                                                                                                                | 12%                                                                                                                                                                                                                                                | 25%                                                                                                                                                   | 7%                       |                      |                      |    |    |    |     |    |                                                                                                                                                                                                                                                                                                                                                                                                                                      |                            |                    |                          |                        |                      |    |    |     |     |    |                                                                                                                                                                                                                                                                                                                                                                                                                                       |                            |                    |                           |                        |                      |    |    |     |     |    |
| Energy<br>529kJ<br>125kcal          | Fat<br>3.7g<br>MED                                                                                                                                                                                                                                                                                                                                                                                                                | Saturated<br>3.0g<br>HIGH                                                                                                                                                                                                                          | Sugar<br>16.6g<br>HIGH                                                                                                                                | Salt<br>0.55g<br>LOW     |                      |                      |    |    |    |     |    |                                                                                                                                                                                                                                                                                                                                                                                                                                      |                            |                    |                          |                        |                      |    |    |     |     |    |                                                                                                                                                                                                                                                                                                                                                                                                                                       |                            |                    |                           |                        |                      |    |    |     |     |    |
| 6%                                  | 5%                                                                                                                                                                                                                                                                                                                                                                                                                                | 15%                                                                                                                                                                                                                                                | 18%                                                                                                                                                   | 9%                       |                      |                      |    |    |    |     |    |                                                                                                                                                                                                                                                                                                                                                                                                                                      |                            |                    |                          |                        |                      |    |    |     |     |    |                                                                                                                                                                                                                                                                                                                                                                                                                                       |                            |                    |                           |                        |                      |    |    |     |     |    |
| Nutri-Score                         |                                                                                                                                                                                                                                                                                                                                                |                                                                                                                                                                 |                                                                  |                          |                      |                      |    |    |    |     |    |                                                                                                                                                                                                                                                                                                                                                                                                                                      |                            |                    |                          |                        |                      |    |    |     |     |    |                                                                                                                                                                                                                                                                                                                                                                                                                                       |                            |                    |                           |                        |                      |    |    |     |     |    |
| Warning label                       |                                                                                                                                                                                                                                                                                                                                                                                                                                   |                                                                                                                                                                 |                                                                  |                          |                      |                      |    |    |    |     |    |                                                                                                                                                                                                                                                                                                                                                                                                                                      |                            |                    |                          |                        |                      |    |    |     |     |    |                                                                                                                                                                                                                                                                                                                                                                                                                                       |                            |                    |                           |                        |                      |    |    |     |     |    |
| Positive Choice tick                |                                                                                                                                                                                                                                                                                                                                                |                                                                                                                                                                                                                                                    |                                                                                                                                                       |                          |                      |                      |    |    |    |     |    |                                                                                                                                                                                                                                                                                                                                                                                                                                      |                            |                    |                          |                        |                      |    |    |     |     |    |                                                                                                                                                                                                                                                                                                                                                                                                                                       |                            |                    |                           |                        |                      |    |    |     |     |    |
| Design features                     | <p>Description: 'Instant Hot Chocolate' – thin font<br/>All: size = 320g<br/><u>Image</u>: plain hot chocolate in a mug</p>                                                                                                                                                                                                                                                                                                       | <p>Description: 'Instant Hot Chocolate' – thicker font</p>                                                                                                                                                                                         | <p>Description: 'Instant Hot Chocolate' – cursive font<br/><u>Image</u>: dark chocolate swirls</p>                                                    |                          |                      |                      |    |    |    |     |    |                                                                                                                                                                                                                                                                                                                                                                                                                                      |                            |                    |                          |                        |                      |    |    |     |     |    |                                                                                                                                                                                                                                                                                                                                                                                                                                       |                            |                    |                           |                        |                      |    |    |     |     |    |

|  |                      |                                                         |                    |
|--|----------------------|---------------------------------------------------------|--------------------|
|  | Colour: light purple | Image: hot chocolate in a mug with a swirl of chocolate | Colour: dark brown |
|  |                      | Colour: darker purple                                   |                    |

**Table S2.** Nutritional specification of products (including information necessary for Multiple Traffic Light labels)

|                           | Portion size                      | Per package |            |            |             |            |            | Per 100g |      |
|---------------------------|-----------------------------------|-------------|------------|------------|-------------|------------|------------|----------|------|
|                           |                                   | kcal        | kJ %RI     | Fat %RI    | Sat fat %RI | Sugar %RI  | Salt %RI   | kJ       | kcal |
| <b>Pizza 1</b>            | 165                               | 368         | 1549<br>18 | 9.9<br>14  | 3.3<br>17   | 6.4<br>7   | 1.16<br>19 | 933      | 223  |
| 2                         |                                   | 404         | 1701<br>20 | 14<br>20   | 7.6<br>38   | 5.0<br>6   | 1.29<br>21 | 1031     | 245  |
| 3                         |                                   | 469         | 1964<br>23 | 22<br>31   | 10.1<br>50  | 5.1<br>6   | 2.8<br>47  | 1188     | 284  |
| <b>Cake 1</b>             | 45                                | 172         | 722<br>9   | 8<br>11    | 0.6<br>3    | 12<br>13   | 0.14<br>2  | 1605     | 383  |
| 2                         |                                   | 179         | 753<br>9   | 8<br>11    | 1.4<br>7    | 17<br>19   | 0.27<br>5  | 1673     | 398  |
| 3                         |                                   | 196         | 815<br>10  | 10<br>15   | 5<br>25     | 19<br>21   | 0.31<br>5  | 1810     | 435  |
| <b>Crisps 1</b>           | 25                                | 99          | 413<br>5   | 1.9<br>3   | 0.3<br>1    | 0.1<br>0   | 0.3<br>4   | 1653     | 395  |
| 2                         |                                   | 109         | 456<br>5   | 4<br>6     | 0.4<br>2    | 0.3<br><1% | 0.6<br>10  | 1822     | 434  |
| 3                         |                                   | 127         | 530<br>6   | 7<br>10    | 0.9<br>4    | 1.3<br>1   | 0.7<br>11  | 2119     | 507  |
| <b>Yoghurt 1</b>          | 125                               | 70          | 298<br>4   | 0.1<br><1% | 0<br>0      | 10.9<br>12 | 0.25<br>4  | 238      | 56   |
| 2                         |                                   | 133         | 562<br>7   | 6.5<br>9   | 6.0<br>30   | 11.3<br>13 | 0.13<br>2  | 450      | 107  |
| 3                         |                                   | 201         | 844<br>10  | 9.3<br>13  | 6.0<br>30   | 27<br>30   | 0.25<br>4  | 707      | 169  |
| <b>Breakfast cereal 1</b> | 45                                | 169         | 713<br>8   | 2.8<br>4   | 0.4<br>2    | 7<br>8     | 0.13<br>2  | 1584     | 375  |
| 2                         |                                   | 185         | 779<br>9   | 6<br>8     | 1.0<br>5    | 11<br>12   | 0.01<br>0  | 1732     | 412  |
| 3                         |                                   | 197         | 830<br>10  | 8<br>11    | 1.6<br>8    | 11<br>12   | 0.5<br>8   | 1845     | 438  |
| <b>Hot Choc 1</b>         | 230ml (30g powder + 200 ml water) | 101         | 422<br>5   | 1.8<br>3   | 1.1<br>5    | 9.9<br>11  | 0.13<br>2  | 184      | 44   |
| 2                         |                                   | 145         | 614<br>7   | 2.8<br>4   | 2.3<br>12   | 22.3<br>25 | 0.41<br>7  | 267      | 63   |
| 3                         |                                   | 125         | 526<br>6   | 3.7<br>5   | 3.0<br>15   | 16.6<br>18 | 0.55<br>9  | 229      | 54   |

Kcal: Kilocalorie; kJ: Kilojoule; RI: Reference Intakes.

**Table S3.** Individual characteristics of the analysis sample, by experimental group

|            | Control<br>(n = 913) | MTL<br>(n = 907) | N-S<br>(n = 924) | WL<br>(n = 895) | PC<br>(n = 891) | Overall<br>(n = 4,530) |
|------------|----------------------|------------------|------------------|-----------------|-----------------|------------------------|
|            | n (%)                | n (%)            | n (%)            | n (%)           | n (%)           | n (%)                  |
| <b>Sex</b> |                      |                  |                  |                 |                 |                        |
| Female     | 518 (56.7)           | 512 (56.5)       | 534 (57.8)       | 510 (57.0)      | 512 (57.5)      | 2,586 (57.1)           |
| Male       | 395 (43.3)           | 395 (43.6)       | 390 (42.2)       | 385 (43.0)      | 379 (42.5)      | 1,944 (42.9)           |

| <b>Age</b>                                                    |            |            |            |            |            |              |
|---------------------------------------------------------------|------------|------------|------------|------------|------------|--------------|
| 18-29                                                         | 61 (6.7)   | 65 (7.2)   | 56 (6.1)   | 56 (6.3)   | 41 (4.6)   | 279 (6.2)    |
| 30-39                                                         | 139 (15.2) | 101 (11.2) | 141 (15.3) | 132 (14.8) | 129 (14.5) | 642 (14.2)   |
| 40-49                                                         | 169 (18.5) | 181 (20.0) | 171 (18.5) | 180 (20.1) | 180 (20.2) | 881 (19.5)   |
| 50-59                                                         | 199 (21.8) | 204 (22.5) | 187 (20.2) | 185 (20.7) | 194 (21.8) | 969 (21.4)   |
| 60-69                                                         | 179 (19.6) | 191 (21.1) | 197 (21.3) | 181 (20.3) | 185 (20.8) | 933 (20.6)   |
| 70+                                                           | 166 (18.2) | 164 (18.1) | 172 (18.6) | 160 (17.9) | 161 (18.1) | 823 (18.2)   |
| <b>Ethnicity</b>                                              |            |            |            |            |            |              |
| White British                                                 | 799 (87.5) | 789 (87.0) | 809 (87.6) | 792 (88.5) | 785 (88.1) | 3,974 (87.7) |
| White other                                                   | 53 (5.8)   | 55 (6.1)   | 51 (5.5)   | 50 (5.6)   | 50 (5.6)   | 259 (5.7)    |
| Mixed or multiple ethnic groups                               | 9 (1.0)    | 13 (1.4)   | 15 (1.6)   | 6 (0.7)    | 11 (1.2)   | 54 (1.2)     |
| Asian or Asian British                                        | 37 (4.1)   | 33 (3.6)   | 28 (3.0)   | 32 (3.6)   | 25 (2.8)   | 155 (3.4)    |
| Black or Black British                                        | 12 (1.3)   | 14 (1.5)   | 17 (1.8)   | 13 (1.5)   | 16 (1.8)   | 72 (1.6)     |
| Other                                                         | 3 (0.3)    | 3 (0.3)    | 4 (0.4)    | 2 (0.2)    | 4 (0.5)    | 16 (0.4)     |
| <b>Education</b>                                              |            |            |            |            |            |              |
| Degree or equivalent +                                        | 460 (50.4) | 435 (48.0) | 450 (48.7) | 426 (47.6) | 425 (47.7) | 2,196 (48.5) |
| A levels or vocational level 3 or equivalent                  | 174 (19.1) | 174 (19.2) | 179 (19.4) | 174 (19.4) | 177 (19.9) | 878 (19.4)   |
| Other qualifications below A levels or equivalent             | 163 (17.9) | 155 (17.1) | 167 (18.1) | 158 (17.7) | 141 (15.8) | 784 (17.3)   |
| Other qualification                                           | 46 (5.0)   | 70 (7.7)   | 44 (4.8)   | 49 (5.5)   | 62 (7.0)   | 271 (6.0)    |
| No qualifications                                             | 70 (7.7)   | 73 (8.1)   | 84 (9.1)   | 88 (9.8)   | 86 (9.7)   | 401 (8.9)    |
| <b>Children in household</b>                                  |            |            |            |            |            |              |
| Yes                                                           | 280 (30.7) | 262 (28.9) | 269 (29.1) | 286 (32.0) | 280 (31.4) | 1,377 (30.4) |
| No                                                            | 633 (69.3) | 645 (71.1) | 655 (70.9) | 609 (68.0) | 611 (68.6) | 3,153 (69.6) |
| <b>Shopping responsibility</b>                                |            |            |            |            |            |              |
| Yes – some or all                                             | 868 (95.0) | 866 (95.5) | 895 (96.9) | 859 (96.0) | 852 (95.6) | 4,340 (95.8) |
| No – someone else does                                        | 45 (4.9)   | 41 (4.5)   | 29 (3.1)   | 36 (4.0)   | 39 (4.4)   | 190 (4.2)    |
| <b>Current label use</b>                                      |            |            |            |            |            |              |
| Very often                                                    | 177 (19.4) | 209 (23.0) | 179 (19.4) | 220 (24.6) | 160 (18.0) | 945 (20.9)   |
| Quite often                                                   | 297 (32.5) | 345 (38.0) | 305 (33.0) | 308 (34.4) | 291 (32.7) | 1,546 (34.1) |
| Occasionally                                                  | 269 (29.5) | 234 (25.8) | 267 (28.9) | 266 (29.7) | 282 (31.7) | 1,318 (29.1) |
| Rarely                                                        | 132 (14.5) | 95 (10.5)  | 142 (15.4) | 83 (9.3)   | 107 (12.0) | 559 (12.3)   |
| Never                                                         | 38 (4.2)   | 24 (2.7)   | 31 (3.4)   | 18 (2.0)   | 51 (5.7)   | 162 (3.6)    |
| <b>Reported consuming or buying product in past 12 months</b> |            |            |            |            |            |              |
| Pizza                                                         | 670 (73.4) | 647 (71.3) | 686 (74.2) | 690 (77.1) | 668 (75.0) | 3,361 (74.2) |
| Drink                                                         | 313 (34.3) | 336 (37.1) | 324 (35.1) | 336 (37.5) | 321 (36.0) | 1,630 (36.0) |
| Cake                                                          | 627 (68.7) | 651 (71.8) | 633 (68.5) | 635 (71.0) | 617 (69.3) | 3,163 (69.8) |
| Crisps                                                        | 752 (82.4) | 739 (81.5) | 772 (83.6) | 753 (84.1) | 707 (79.4) | 3,723 (82.2) |
| Yoghurt                                                       | 761 (83.4) | 755 (83.2) | 772 (83.6) | 747 (83.5) | 744 (83.5) | 3,779 (83.4) |
| Breakfast cereal                                              | 779 (85.3) | 757 (83.5) | 755 (81.7) | 756 (84.5) | 755 (84.7) | 3,802 (83.9) |

MTL, Multiple Traffic Light; N-S, Nutri-Score; WL, Warning Label; PC, Positive Choice tick; RR: Relative Risk; CI: Confidence Interval.

**Table S4.** Proportion of missing data per variable ( $n = 4,863$ )

|                                                         | <b>n (%)</b> |
|---------------------------------------------------------|--------------|
| Sex                                                     | 0 (0)        |
| Age                                                     | 6 (0.1)      |
| Ethnicity                                               | 58 (1.6)     |
| Education                                               | 16 (0.3)     |
| Children in household                                   | 21 (0.4)     |
| Shopping responsibility                                 | 1 (0.0)      |
| Current label use                                       | 0 (0.0)      |
| Reported consuming or buying product in past 12 months* | 0 (0.0)      |



| Baseline ranking            |          |
|-----------------------------|----------|
| Pizza                       | 55 (1.1) |
| Drink                       | 98 (2.0) |
| Cake                        | 53 (1.1) |
| Crisps                      | 47 (1.0) |
| Yoghurt                     | 71 (1.5) |
| Breakfast cereal            | 56 (1.2) |
| Follow-up ranking           |          |
| Pizza                       | 48 (1.0) |
| Drink                       | 55 (1.1) |
| Cake                        | 40 (0.8) |
| Crisps                      | 38 (0.8) |
| Yoghurt                     | 49 (1.0) |
| Breakfast cereal            | 51 (1.0) |
| Enough information question |          |
| Baseline                    | 20 (0.4) |
| Follow-up                   | 27 (0.6) |
| Reported seeing the label   | 2 (0.0)  |

Missing data includes the following responses: refused, don't know, not applicable

**Table S5.** Summary of participants who correctly ranked products at baseline and follow-up, by FOPL group and product category

|                         | Control<br>% correct |                | MTL<br>% correct |                | NS<br>% correct |                | WL<br>% correct |                | PC<br>% correct |                | Overall<br>% correct |                 |
|-------------------------|----------------------|----------------|------------------|----------------|-----------------|----------------|-----------------|----------------|-----------------|----------------|----------------------|-----------------|
|                         | Baseline             | Follow-up      | Baseline         | Follow-up      | Baseline        | Follow-up      | Baseline        | Follow-up      | Baseline        | Follow-up      | Baseline             | Follow-up       |
| <b>Pizza</b>            | 465<br>(69.4%)       | 456<br>(68.1%) | 473<br>(73.1%)   | 582<br>(90.0%) | 508<br>(74.1%)  | 640<br>(93.3%) | 476<br>(69.0%)  | 563<br>(81.6%) | 490<br>(73.4%)  | 491<br>(73.5%) | 2412<br>(71.8%)      | 2732<br>(81.3%) |
| <b>Drinks</b>           | 198<br>(63.3%)       | 196<br>(62.6)  | 212<br>(63.1%)   | 286<br>(85.1%) | 183<br>(56.5%)  | 306<br>(94.4%) | 221<br>(65.8%)  | 280<br>(83.3%) | 194<br>(60.4%)  | 221<br>(68.9%) | 1008<br>(61.8%)      | 1289<br>(79.1%) |
| <b>Puddings</b>         | 422<br>(67.3%)       | 417<br>(66.5%) | 428<br>(65.8%)   | 593<br>(91.1%) | 445<br>(70.3%)  | 590<br>(93.2%) | 399<br>(62.8%)  | 547<br>(86.1%) | 422<br>(68.4%)  | 411<br>(66.6%) | 2116<br>(66.9%)      | 2558<br>(80.9%) |
| <b>Snack</b>            | 453<br>(60.2%)       | 459<br>(61.0%) | 468<br>(63.3%)   | 675<br>(91.3%) | 478<br>(61.9%)  | 723<br>(93.7%) | 504<br>(66.9%)  | 629<br>(83.5%) | 454<br>(64.2%)  | 464<br>(65.6%) | 2357<br>(63.3%)      | 2950<br>(79.2%) |
| <b>Yoghurt</b>          | 98 (12.9%)           | 101<br>(13.3%) | 107<br>(14.2%)   | 642<br>(85.0%) | 86<br>(11.1%)   | 660<br>(85.5%) | 90<br>(12.1%)   | 458<br>(61.3%) | 66<br>(8.9%)    | 117<br>(15.7%) | 447<br>(11.8%)       | 1978<br>(52.3%) |
| <b>Breakfast cereal</b> | 261<br>(33.5%)       | 267<br>(34.3%) | 252<br>(33.3%)   | 658<br>(86.9%) | 256<br>(33.9%)  | 664<br>(88.0%) | 238<br>(31.5%)  | 546<br>(72.2%) | 261<br>(34.6%)  | 299<br>(39.6%) | 1268<br>(33.4%)      | 2434<br>(64.0%) |

FOPL: front of pack label; MTL, Multiple Traffic Light; N-S, Nutri-Score; WL, Warning Label; PC, Positive Choice tick.

**Table S6.** Multilevel log-binomial regression results - follow-up (FOPL group) correct (yes /no) and adjusted for baseline rank compared to control (also adjusted for design factors and covariates as planned) in full sample ( $n = 4,530$ )

| MTL v Control<br>RR (95%CI) | N-S v Control<br>RR (95%CI) | WL v Control<br>RR (95%CI) | PT v Control<br>RR (95%CI) | N-S v MTL<br>RR (95%CI) |
|-----------------------------|-----------------------------|----------------------------|----------------------------|-------------------------|
|-----------------------------|-----------------------------|----------------------------|----------------------------|-------------------------|

|                         |                                          |                                          |                                          |                                                              |                                         |
|-------------------------|------------------------------------------|------------------------------------------|------------------------------------------|--------------------------------------------------------------|-----------------------------------------|
| <b>Pizza</b>            | 1.19<br>(1.09, 1.31)<br><i>p</i> < 0.001 | 1.26<br>(1.16, 1.38)<br><i>p</i> < 0.001 | 1.15<br>(1.05, 1.25)<br><i>p</i> < 0.01  | 0.98<br>(0.91, 1.06)<br>0.63<br><i>p</i> = 0.22              | 1.06<br>(0.97, 1.16)                    |
| <b>Drink</b>            | 1.37<br>(1.24, 1.51)<br><i>p</i> < 0.001 | 1.66<br>(1.51, 1.83)<br><i>p</i> < 0.001 | 1.29<br>(1.18, 1.40)<br><i>p</i> < 0.001 | 1.13<br>(1.04, 1.23)<br><i>p</i> < 0.01                      | 1.21<br>(1.09, 1.35)<br><i>p</i> < 0.01 |
| <b>Cake</b>             | 1.41<br>(1.30, 1.54)<br><i>p</i> < 0.001 | 1.44<br>(1.33, 1.57)<br><i>p</i> < 0.001 | 1.37<br>(1.26, 1.48)<br><i>p</i> < 0.001 | 1.01 <sup>†</sup><br>(0.95, 1.08)<br>0.76<br><i>p</i> = 0.70 | 1.02<br>(0.93, 1.12)                    |
| <b>Crisps</b>           | 1.43<br>(1.31, 1.56)<br><i>p</i> < 0.001 | 1.50<br>(1.37, 1.64)<br><i>p</i> < 0.001 | 1.27<br>(1.17, 1.38)<br><i>p</i> < 0.001 | 1.02 <sup>†</sup><br>(0.95, 1.10)<br>0.59<br><i>p</i> = 0.38 | 1.05<br>(0.95, 1.16)                    |
| <b>Yoghurt</b>          | 6.19<br>(4.79, 8.01)<br><i>p</i> < 0.001 | 6.86<br>(5.14, 9.24)<br><i>p</i> < 0.001 | 4.24<br>(3.15, 5.71)<br><i>p</i> < 0.001 | 1.79<br>(1.35, 2.37)<br><i>p</i> < 0.001                     | 1.11<br>(0.80, 1.55)<br><i>p</i> = 0.53 |
| <b>Breakfast cereal</b> | 2.51<br>(2.14, 2.95)<br><i>p</i> < 0.001 | 2.61<br>(2.21, 3.08)<br><i>p</i> < 0.001 | 2.43<br>(2.02, 2.93)<br><i>p</i> < 0.001 | 1.17<br>(0.99, 1.37)<br>P = 0.06                             | 1.04<br>(0.87, 1.24)<br><i>p</i> = 0.69 |

<sup>†</sup>Cake and crisps categories had no products qualify for Positive Choice tick; all analyses were adjusted for baseline ranking (correct/ incorrect), stratification factors (year of recruitment to panel, sex, age, government office region, household income), and the following pre-specified covariates: ethnicity, highest education level, household composition, food shopping responsibility, and current FOPL use. FOPL: front of pack label; MTL, Multiple Traffic Light; N-S, Nutri-Score; WL, Warning Label; PC, Positive Choice tick; RR: Relative Risk; CI: Confidence Interval.

**Table S7.** Log-binomial regression results – relative risk that ranking improved (follow-up vs baseline) between FOPL group and control (adjusted for design factors and covariates as planned) in full sample (*n* = 4,530)

|                         | MTL v Control<br>RR (95%CI)                 | N-S v Control<br>RR (95%CI)                 | WL v Control<br>RR (95%CI)                  | PC v Control<br>RR (95%CI)                                   | N-S v MTL<br>RR (95%CI)                 |
|-------------------------|---------------------------------------------|---------------------------------------------|---------------------------------------------|--------------------------------------------------------------|-----------------------------------------|
| <b>Pizza</b>            | 2.23<br>(1.56, 3.17)<br><i>p</i> < 0.001    | 2.46<br>(1.74, 3.48)<br><i>p</i> < 0.001    | 1.95<br>(1.36, 2.80)<br><i>p</i> < 0.001    | 0.86<br>(0.58, 1.28)<br>0.46<br><i>p</i> = 0.40              | 1.11<br>(0.88, 1.39)                    |
| <b>Drink</b>            | 4.04<br>(2.73, 5.96)<br><i>p</i> < 0.001    | 5.32<br>(3.64, 7.76)<br><i>p</i> < 0.001    | 3.29<br>(2.22, 4.90)<br><i>p</i> < 0.001    | 1.82<br>(1.18, 2.81)<br><i>p</i> < 0.01                      | 1.32<br>(1.10, 1.58)<br><i>v</i> < 0.01 |
| <b>Cake</b>             | 8.05<br>(4.83, 13.44)<br><i>p</i> < 0.001   | 8.02<br>(4.84, 13.30)<br><i>p</i> < 0.001   | 7.06<br>(4.24, 11.76)<br><i>p</i> < 0.001   | 1.00 <sup>†</sup><br>(0.51, 1.97)<br>0.99<br><i>p</i> = 0.97 | 0.99<br>(0.81, 1.22)                    |
| <b>Crisps</b>           | 4.75<br>(3.29, 6.84)<br><i>p</i> < 0.001    | 5.35<br>(3.72, 7.69)<br><i>p</i> < 0.001    | 3.59<br>(2.45, 5.26)<br><i>p</i> < 0.001    | 1.36 <sup>†</sup><br>(0.85, 2.20)<br>0.20<br><i>p</i> = 0.20 | 1.13<br>(0.94, 1.35)                    |
| <b>Yoghurt</b>          | 22.70<br>(14.72, 34.99)<br><i>p</i> < 0.001 | 22.89<br>(14.84, 35.30)<br><i>p</i> < 0.001 | 15.63<br>(10.08, 24.24)<br><i>p</i> < 0.001 | 2.84<br>(1.70, 4.73)<br><i>p</i> < 0.001                     | 1.01<br>(0.93, 1.10)<br><i>p</i> = 0.85 |
| <b>Breakfast cereal</b> | 7.64<br>(5.44, 10.73)<br><i>p</i> < 0.001   | 8.37<br>(5.98, 11.73)<br><i>p</i> < 0.001   | 6.90<br>(4.90, 9.73)<br><i>p</i> < 0.001    | 2.05<br>(1.37, 3.05)<br><i>p</i> < 0.001                     | 1.10<br>(0.98, 1.23)<br><i>p</i> = 0.13 |

<sup>†</sup>Cake and crisps categories had no products qualify for Positive Choice tick; all analyses were adjusted for the five stratification factors (year of recruitment to panel, sex, age, government office region, household income) and the following pre-specified covariates: ethnicity, highest education level,



household composition, food shopping. FOPL: front of pack label; MTL, Multiple Traffic Light; N-S, Nutri-Score; WL, Warning Label; PC, Positive Choice tick; RR: Relative Risk; CI: Confidence Interval.

**Table S8.** Multiple regression analysis results- association between global food score and FOPL group (adjusted for design factors and covariates as planned) in full sample ( $n = 4,530$ )

|                                      | <b>MTL v Control<br/>RR (95%CI)</b> | <b>N-S v Control<br/>RR (95%CI)</b> | <b>WL v Control<br/>RR (95%CI)</b> | <b>PC v Control<br/>RR (95%CI)</b> | <b>N-S v MTL<br/>RR (95%CI)</b> |
|--------------------------------------|-------------------------------------|-------------------------------------|------------------------------------|------------------------------------|---------------------------------|
| <b>Score (-5, +5)</b>                | 1.8                                 | 2.0                                 | 1.4                                | 0.1                                | 0.3                             |
| <b>Regression<br/>(coefficients)</b> | (1.7, 1.9)<br><i>p</i> < 0.001      | (1.9, 2.1)<br><i>p</i> < 0.001      | (1.2, 1.5)<br><i>p</i> < 0.001     | (0.02, 0.2)<br><i>p</i> = 0.03     | (0.2, 0.5)<br><i>p</i> < 0.001  |

Global food score was an aggregated score of correct ranking in the five food products, range -5 to +5 (- indicates worsening and + indicates improvement) ; all analyses adjusted for stratification factors (year of recruitment to panel, sex, age, government office region, household income) and covariates: ethnicity, highest education level, household composition, food shopping responsibility, current FOPL use. FOPL: front of pack label; MTL, Multiple Traffic Light; N-S, Nutri-Score; WL, Warning Label; PC, Positive Choice tick; RR: Relative Risk; CI: Confidence Interval.
